# Supplementary material for: Self-healable hydrogels with cross-linking induced thermo-responsiveness and multi-triggered gel–sol–gel transition
Source: Royal Society of Chemistry journal article supplement (doi:10.1039/c7py00445a), 2017-01-01
Supplement: c7py00445a1.pdf [file c7py00445a1.pdf]

## Supplementary Information

### Self-Healable Hydrogels with Cross-Linking Induced Thermo-Responsiveness and Multi-Triggered Gel-Sol-Gel Transition

Xuemeng Wang, Gang Bian, Miao Zhang, Limin Chang, Zhiwei Li, Xu Li, Heng An, Jianglei Qin,\*  
Ruixue Chang and Haijun Wang\*

College of Chemistry and Environmental Science, Hebei University, 180 East Wusi Road, Baoding 071002, China.

Corresponding Authors' email addresses: [qinhbu@iccas.ac.cn](mailto:qinhbu@iccas.ac.cn)

## Contents

Fig. S1 P(DMA<sub>96</sub>-*stat*-DAA<sub>50</sub>) cross-linked with 5:2 ratio of DTPDH.

Fig. S2 Repeated self-healing of hydrogel prepared from P(DMA<sub>96</sub>-*stat*-DAA<sub>50</sub>) cross-linked by 5:2 ratio of PEO<sub>23</sub> dihydrazide.

Fig. S3 Photograph of hydrogel prepared from P(DMA<sub>90</sub>-*stat*-DAA<sub>10</sub>) with ADH cross-linking. (a: after incubated for 12 h; the pH was regulated to 2 by HCl; c: the HCl was neutralized by TEA).

Fig. S4 Photograph of hydrogel prepared from P(DMA<sub>96</sub>-*stat*-DAA<sub>50</sub>) with 1 : 1 ratio ADH cross-linking. (a: after incubated for 12 h; the pH was regulated to 2 by HCl; c: the HCl was neutralized by TEA; d: after 4 cycles).

Fig. S5 Hydrogel from P(DMA<sub>96</sub>-*stat*-DAA<sub>50</sub>) cross-linked by 2.5:1 ratio of PEO<sub>23</sub> dihydrazide dissolved by addition of HCl (a) and hydrogel reobtained by further addition of triethylamine (b).

Fig. S6 The DTT reduced hydrogel after addition of (left) H<sub>2</sub>O<sub>2</sub> and (right) Fe<sub>2</sub>O<sub>3</sub>.

Fig. S7 Hydrogel from P(DMA<sub>93</sub>-*stat*-DAA<sub>30</sub>) cross-linked by DTDPH did not show gel-sol transition by DTT reduction.

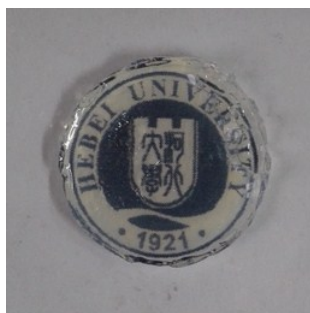

Fig. S1 P(DMA<sub>96</sub>-*stat*-DAA<sub>50</sub>) cross-linked with 5:2 ratio of DTPDH.

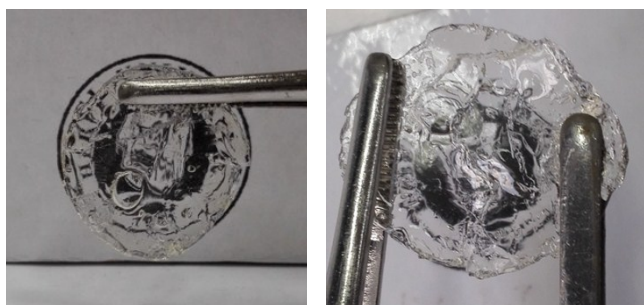

Fig. S2 Repeated self-healing of hydrogel prepared from P(DMA<sub>96</sub>-*stat*-DAA<sub>50</sub>) cross-linked by 5:2 ratio of PEO<sub>23</sub> dihydrazide in 12 h.

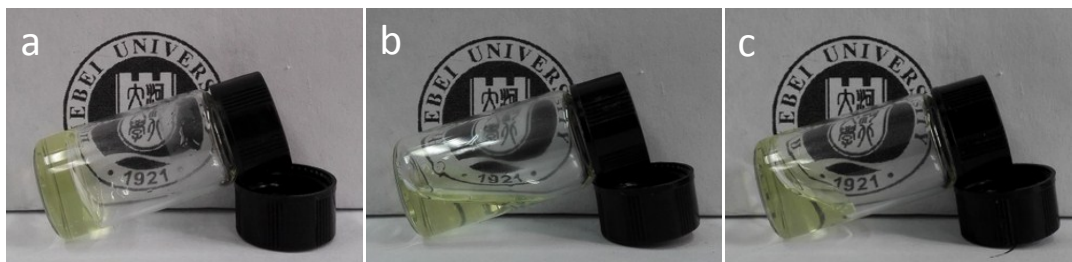

Fig. S3 Photograph of hydrogel prepared from P(DMA<sub>90</sub>-*co*-DAA<sub>10</sub>) with ADH cross-linking. (a: after incubated for 12 h; the pH was regulated to 2 by HCl; c: the HCl was neutralized by TEA) (Credit form Hebei University)

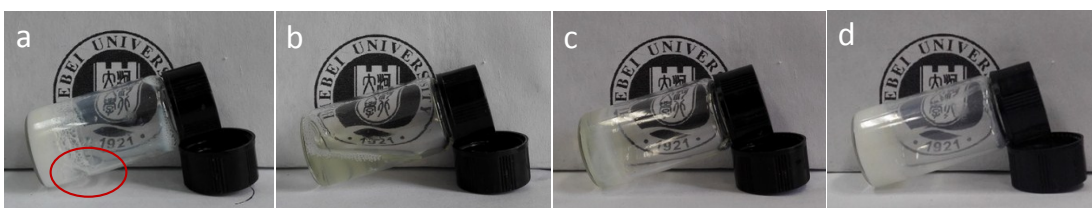

Fig. S4 Photograph of hydrogel prepared from P(DMA<sub>96</sub>-*co*-DAA<sub>50</sub>) with 1 : 1 ratio ADH cross-linking. (a: after incubated for 12 h; the pH was regulated to 2 by HCl; c: the HCl was neutralized by TEA; d: after 4 cycles) (Credit form Hebei University)

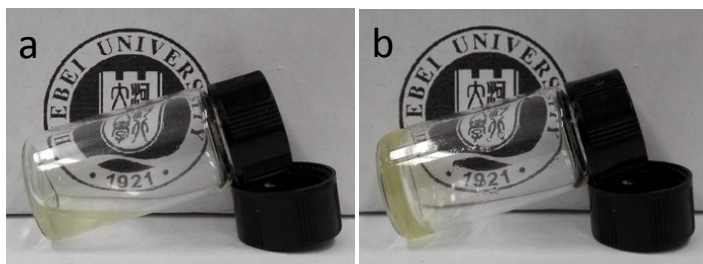

Fig. S5 Hydrogel from P(DMA<sub>96</sub>-*stat*-DAA<sub>50</sub>) cross-linked by 2.5:1 ratio of PEO<sub>23</sub> dihydrazide dissolved by addition of HCl (a) and hydrogel re-obtained by further addition of triethylamine (b).

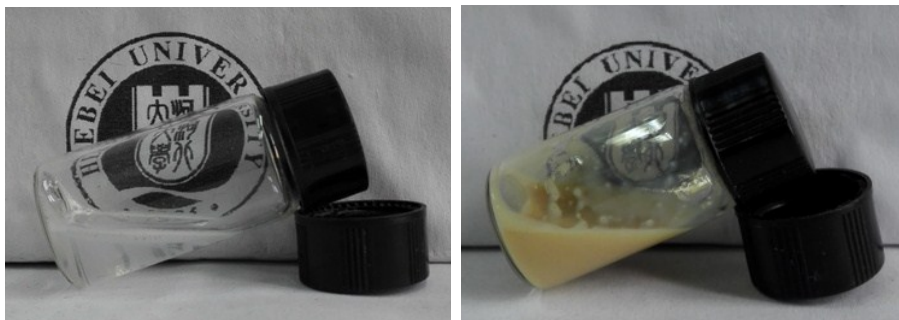

Fig. S6 The DTT reduced hydrogel after addition of (left) H<sub>2</sub>O<sub>2</sub> and (right) Fe<sub>2</sub>O<sub>3</sub>.

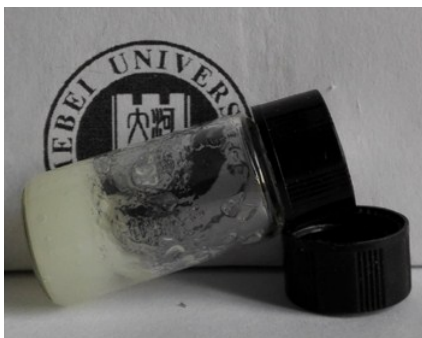

Fig. S7 Hydrogel from P(DMA<sub>93</sub>-*stat*-DAA<sub>30</sub>) cross-linked by DTDPH did not show gel-sol transition by DTT reduction.
